# Supplementary material for: Removal of unwanted variation reveals novel patterns of gene expression linked to sleep homeostasis in murine cortex
Source: PubMed Central journal article supplement (PMC5088519; doi:10.1186/s12864-016-3065-8), 2016-10-25

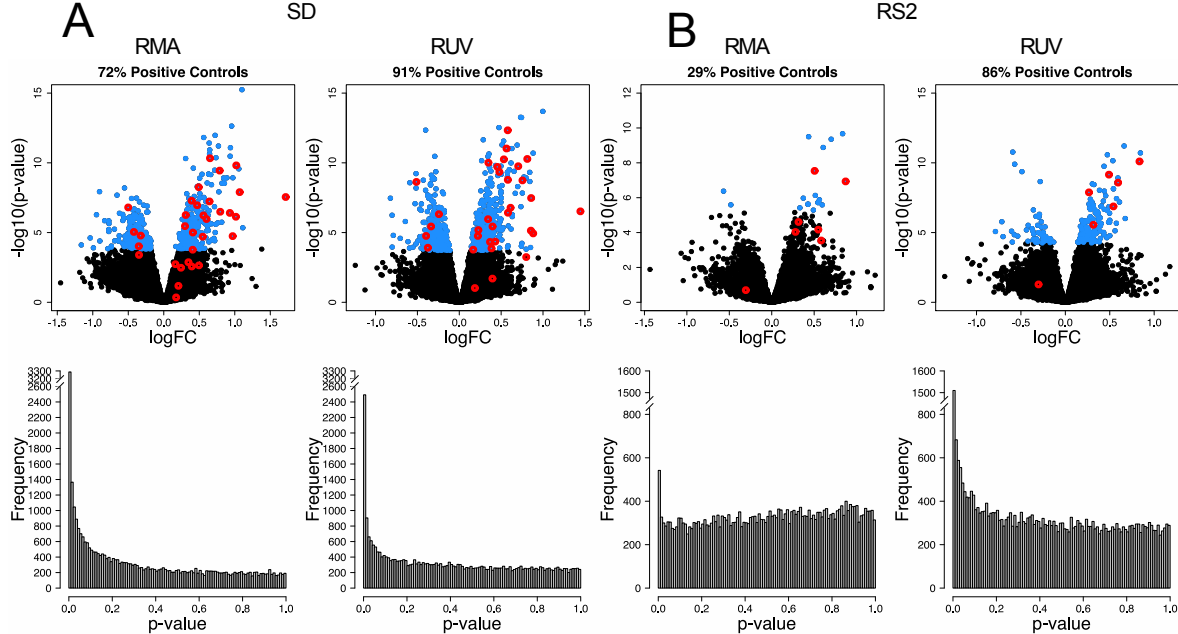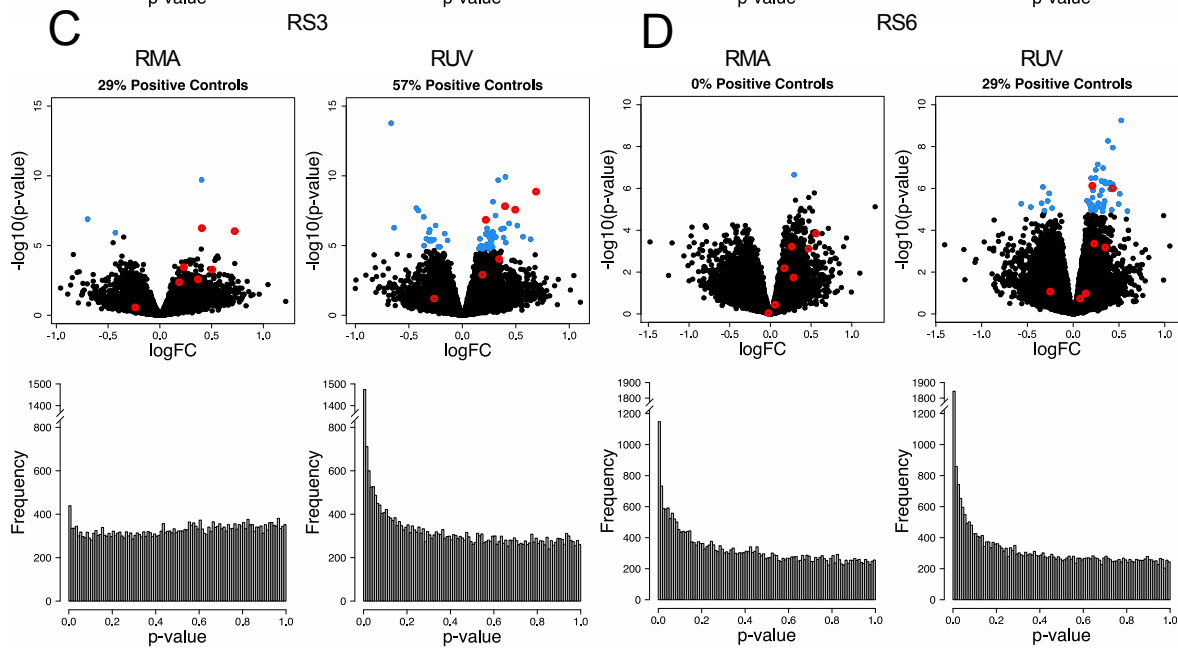

Supplement: 12864_2016_3065_MOESM3_ESM.pdf [file 12864_2016_3065_MOESM3_ESM.pdf]
